# Supplementary material for: A Novel, Hand‐Held, and Low‐Level Light Therapy Device for the Treatment of Acne Vulgaris: A Single‐Arm, Prospective Clinical Study
Source: Hindawi journal article supplement (doi:10.1155/2023/8846620), 2023-01-01
Supplement: f1 [file 8846620.f1.docx]

**Supplementary Material**

**Supplementary Figure Legends**

**
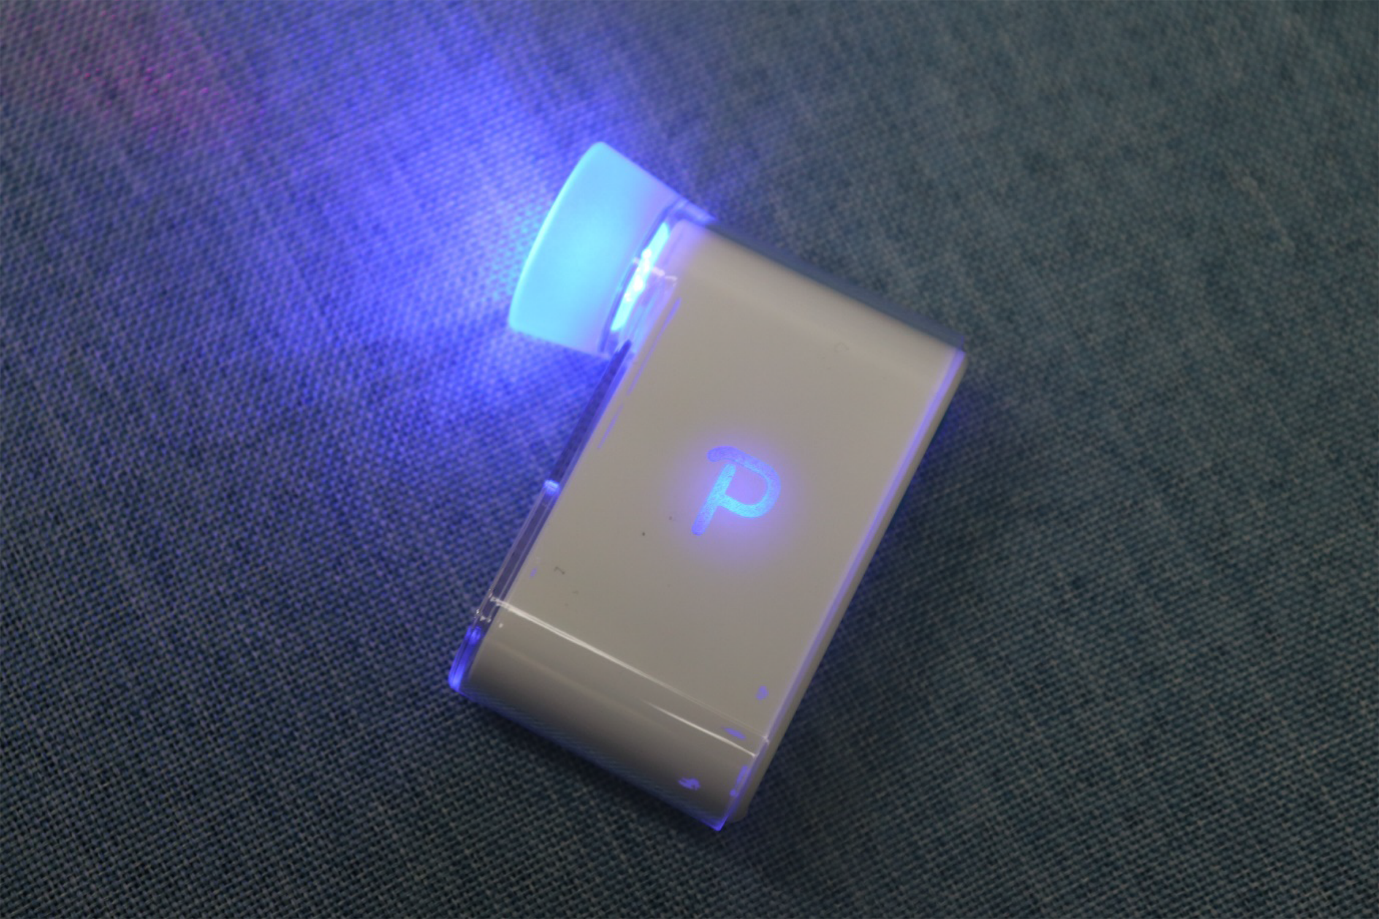
**

**Figure S1.** P1-FOX (PAD-FA120; Ptech Corp., Pyeongtaek, Korea).

**Supplementary Tables**

**Table S1.** Lists of primers used in the study.

| Gene |  | Primer Sequence (5’ to 3’) |
| --- | --- | --- |
| 18s | F | CCT TTA ACG AGG ATC CAT TGG A |
|  | R | ACG AGC TTT TTA ACT GCA GCA A |
| COL1 | F | GCT CCT CTT AGG GGC CAC T |
|  | R | CCT TTGTCA GAA TAC TGA GCA GC |
| FN | F | ATG TGG ACC CCT CCT GAT AGT |
|  | R | GCC CAG TGA TTT CAG CAA AGG |
| COX2 | F | TGA GCA ACT ATT CCA AAC CAG C |
|  | R | GCA CGT AGT CTT CGA TCA CTA TC |
| EGF | F | AGC ATC TCT CGG ATT GAC CCA |
|  | R | CCT GTC CCG TTA AGG AAA ACT CT |
| FGF2 | F | GCG ACC CAC ACG TCA AAC TA |
|  | R | CCG TCC ATC TTC CTT CAT AGC |

**Table S2.** Investigator’s Global Severity Assessment.

| Grade | Description |
| --- | --- |
| 0 | Clear skin with no inflammatory or non-inflammatory lesions |
| 1 | Almost clear, rare non-inflammatory lesions with no more than one small inflammatory lesion |
| 2 | Mild severity; greater than Grade 1; some non-inflammatory lesions with no more than a few inflammatory lesions (papules ⁄pustules only, no nodular lesions) |
| 3 | Moderate severity; greater than Grade 2; up to many non-inflammatory lesions and may have some inflammatory lesions, but no more than one small nodular lesion |
| 4 | Severe, greater than Grade 3; up to many non-inflammatory and inflammatory lesions, but no more than a few nodular lesions |
